# Supplementary material for: Theoretical Analysis of the Effect Provoked by Bromine-Addition on the Thermolysis and Chemiexcitation of a Model Dioxetanone
Source: Hindawi journal article supplement (doi:10.1155/2017/1903981), 2017-01-01
Supplement: f1 [file 1903981.f1.docx]

**Theoretical Analysis of the Effect Provoked By Bromine-Addition on the Thermolysis and Chemiexcitation of a Model Dioxetanone**

Luís Pinto da Silva,1 Rui F.J. Pereira,1 and Joaquim C.G. Esteves da Silva1,2

1 Chemistry Research Unit (CIQUP), Departamento de Química e Bioquímica, Faculdade de Ciências da Universidade do Porto, R. Campo Alegre 687, 4169-007 Porto, Portugal.

2 Chemistry Research Unit (CIQUP), Departamento de Geociências, Ambiente e Ordenamento do Território, Faculdade de Ciências da Universidade do Porto, R. Campo Alegre 687, 4169-007 Porto, Portugal.

Correspondence should be addressed to Luís Pinto da Silva: [luis.silva@fc.up.pt](mailto:luis.silva@fc.up.pt)

**Table of Contents**

**Table S1** - Transition state structure, obtained at the CAM-B3LYP/BS-1 level of theory, used as starting point for the IRC calculations of the thermolysis of IVa.

**Table S2** - Transition state structure, obtained at the CAM-B3LYP/BS-1 level of theory, used as starting point for the IRC calculations of the thermolysis of IVb.

**Table S3** - Transition state structure of IVb computed with the QST3 method, obtained at the CAM-B3LYP/BS-1 level of theory.

**Table S4** - Transition state structure of IVc computed with the QST3 method, obtained at the CAM-B3LYP/BS-1 level of theory.

**Table S5** - Transition state structure of IVd computed with the QST3 method, obtained at the CAM-B3LYP/BS-1 level of theory.

**Table S6** - *T1* structure of Va, obtained at the CAM-B3LYP/BS-1 level of theory.

**Table S7** - *T1* structure of Vb, obtained at the CAM-B3LYP/BS-1 level of theory.

**Table S8** - *T1* structure of Vc, obtained at the CAM-B3LYP/BS-1 level of theory.

**Table S9** - *T1* structure of Vd, obtained at the CAM-B3LYP/BS-1 level of theory.

**Table S1** - Transition state structure, obtained at the CAM-B3LYP/BS-1 level of theory, used as starting point for the IRC calculations of the thermolysis of IVa.

C 2.1254539706 0.9687999463 -0.631537854

C 1.6032360122 -0.538495959 -0.041089764

N 0.6041520645 -1.0505559496 -0.9097147967

O 2.5708832082 1.1335718681 -1.7117442379

H 2.4888480129 -1.1868435029 -0.0121718859

O 1.319146742 0.0599817979 1.0890173162

O 1.8700886198 1.752514815 0.3449937385

C -0.6034584612 -0.6389018022 -0.9275816589

C -1.2996613395 0.4422771361 -0.1741989723

C -2.5678009968 0.4598885548 -0.6059505127

C -2.7699883159 -0.5910651349 -1.6395459436

C -1.6166898509 -1.2385914423 -1.8356699945

H -0.8346178445 1.0771329724 0.5630097163

H -3.3464936689 1.1321525859 -0.2670254569

H -1.39511296 -2.0524676572 -2.5106134218

H -3.7116188525 -0.7766232582 -2.1402001819

**Table S2** - Transition state structure, obtained at the CAM-B3LYP/BS-1 level of theory, used as starting point for the IRC calculations of the thermolysis of IVb.

C 2.1281294522 0.9715014752 -0.6419622513

C 1.598746619 -0.5353477388 -0.0402998418

N 0.6029536176 -1.0500000044 -0.9094455621

O 2.5923804727 1.1248212239 -1.7147888553

H 2.4831970301 -1.1841081177 -0.0020832008

O 1.3109327156 0.0768716142 1.0814367872

O 1.8503764045 1.7613151216 0.3235087122

C -0.6060846313 -0.6430869432 -0.9286542869

C -1.3052403269 0.4361765056 -0.1697298978

C -2.5746272376 0.4572037853 -0.5929692932

C -2.7520018923 -0.5947468651 -1.623881864

C -1.6087475814 -1.2489617249 -1.8390279251

H -0.8401202277 1.0706493957 0.5679746364

H -3.367786923 1.1155370295 -0.2647449009

H -1.3964146184 -2.0593566629 -2.5189776263

Br -4.4371501031 -0.8986084439 -2.4857170903

**Table S3** - Transition state structure of IVb computed with the QST3 method, obtained at the CAM-B3LYP/BS-1 level of theory.

C 3.50014 1.19920 0.61117

C 2.96732 -0.30546 1.21538

N 1.97259 -0.82085 0.34548

O 3.96740 1.34926 -0.46078

H 3.85090 -0.95519 1.25673

O 2.67819 0.30984 2.33498

O 3.22101 1.99180 1.57408

C 0.76414 -0.41237 0.32291

C 0.06497 0.66970 1.07779

C -1.20361 0.69127 0.65215

C -1.38044 -0.36311 -0.37637

C -0.23759 -1.01925 -0.58781

H 0.52961 1.30565 1.81453

H -1.99647 1.35160 0.97706

H -0.02513 -1.83187 -1.26505

Br -3.06448 -0.66731 -1.24024

**Table S4** - Transition state structure of IVc computed with the QST3 method, obtained at the CAM-B3LYP/BS-1 level of theory.

C 3.51356 1.20501 0.61145

C 2.97670 -0.30054 1.22069

N 1.98228 -0.81581 0.35251

O 3.97682 1.35041 -0.46240

H 3.85913 -0.95141 1.26445

O 2.68736 0.32072 2.33666

O 3.23953 1.99707 1.57543

C 0.77685 -0.41167 0.33301

C 0.06255 0.65983 1.07772

C -1.20381 0.67175 0.63903

C -1.40830 -0.37359 -0.39597

C -0.24732 -1.00649 -0.57790

H 0.52033 1.29657 1.81771

H -1.98781 1.33949 0.97418

H -2.34192 -0.57023 -0.90438

Br 0.13173 -2.44550 -1.77563

**Table S5** - Transition state structure of IVd computed with the QST3 method, obtained at the CAM-B3LYP/BS-1 level of theory.

C 3.73211 1.14687 0.62021

C 3.03674 -0.30467 1.20864

N 1.93136 -0.65500 0.41044

O 3.99574 1.32236 -0.51598

H 3.82349 -1.06751 1.12502

O 2.95729 0.27618 2.37675

O 3.79977 1.85111 1.67874

C 0.71722 -0.28056 0.38733

C -0.13781 0.72873 1.10387

C -1.38281 0.62768 0.61934

C -1.43448 -0.42792 -0.41555

C -0.21452 -0.95057 -0.56486

H 0.11995 -1.73819 -1.22421

H -2.33381 -0.70476 -0.95006

H -2.22546 1.23237 0.92738

Br 0.37333 2.02908 2.41676

**Table S6** - *T1* structure of Va, obtained at the CAM-B3LYP/BS-1 level of theory.

C 1.32329900 -0.75131000 0.67100600

N 0.43026900 -1.27681900 -0.24614900

H 2.34295400 -1.14156400 0.51731700

O 1.08697600 0.03216400 1.57622400

C -0.80882800 -0.80566100 -0.28945700

C -1.47907500 0.24985700 0.43138300

C -2.83798700 0.33040500 -0.04408400

C -3.02549500 -0.61636600 -1.01319300

C -1.78958100 -1.33494400 -1.18897300

H -1.01996000 0.85821500 1.19509800

H -3.57778900 1.03174200 0.31878900

H -1.60073100 -2.14651100 -1.87936900

H -3.93934000 -0.80382900 -1.56091700

**Table S7** - *T1* structure of Vb, obtained at the CAM-B3LYP/BS-1 level of theory.

C 2.91044400 -0.39756400 1.30234100

N 2.00819500 -0.93478800 0.39810600

H 3.91397500 -0.83822100 1.18853700

O 2.69366000 0.45038600 2.15180600

C 0.76989500 -0.46217000 0.36027900

C 0.09360300 0.58493700 1.09079900

C -1.26340000 0.67263800 0.62839500

C -1.43387700 -0.26993400 -0.34397700

C -0.20329500 -0.99459400 -0.54278200

H 0.55119500 1.19013700 1.85786700

H -2.01093200 1.36389000 0.99139700

H -0.03088100 -1.79868800 -1.24453300

Br -3.03888700 -0.61708900 -1.32281200

**Table S8** - *T1* structure of Vc, obtained at the CAM-B3LYP/BS-1 level of theory.

C 2.90732100 -0.39105000 1.34056600

N 2.02965000 -0.92427000 0.41165800

H 3.94254800 -0.72341000 1.16083600

O 2.63831600 0.33668600 2.28108200

C 0.79041800 -0.47128200 0.35650400

C 0.10303600 0.58465800 1.05804500

C -1.25131200 0.65947500 0.58423700

C -1.44470000 -0.29313600 -0.37743200

C -0.20183500 -1.00181900 -0.53615500

H 0.56052700 1.19853200 1.81852300

H -1.99266400 1.36202700 0.94092700

H -2.34920700 -0.49943800 -0.93191400

Br 0.07566900 -2.42383800 -1.74477700

**Table S9** - *T1* structure of Vd, obtained at the CAM-B3LYP/BS-1 level of theory.

C 2.89520000 -0.39311800 1.39159300

N 2.01454300 -0.69900100 0.37632700

H 3.89349200 -0.11385400 1.00930300

O 2.66998700 -0.52496700 2.57601500

C 0.74691700 -0.35221300 0.34480800

C -0.00778200 0.69186300 0.99825400

C -1.38530600 0.64019100 0.56031500

C -1.50078800 -0.37449600 -0.34247100

C -0.21199500 -0.99046400 -0.50755200

H 0.03418800 -1.82033200 -1.15660700

H -2.40581200 -0.67445900 -0.85308500

H -2.16026400 1.30936500 0.90675700

Br 0.64809900 2.06635300 2.11718900
